# Supplementary material
Source: MDPI journal article supplement (https://www.mdpi.com/2673-9976/18/1/65)

# Chemical and nutritional characterization of by-products from the wine industry. Source of healthy ingredients for the formulation of nutraceuticals and functional foods

Grape by-products

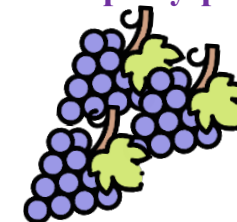

Franklin Chamorro<sup>1</sup>, Lucia Cassani<sup>1,2,3</sup>, Pauline Donn <sup>1</sup>, Sepidar Seyyedi Mansour<sup>1</sup>, Maria Fraga<sup>1,2</sup>, Jianbo Xiao<sup>1</sup>, Jesus Simal-Gandara<sup>1</sup>, Miguel A. Prieto<sup>1,2,\*</sup> Paz Otero<sup>1,2,\*</sup>,

<sup>1</sup> *Nutrition and Bromatology Group, Department of Analytical and Food Chemistry, Faculty of Food Science and Technology, University of Vigo, Ourense Campus, E32004 Ourense, Spain.*

<sup>2</sup> *Centro de Investigação de Montanha (CIMO), Instituto Politécnico de Bragança, Campus de Santa Apolonia, 5300-253 Bragança, Portugal.*

<sup>3</sup> *Instituto de Investigaciones en Ciencia y Tecnología de Materiales (INTEMA, CONICET), Colón 10850, Mar del Plata (7600), Argentina*

**\*Corresponding author's emails:** Paz Otero ([paz.otero@uvigo.es](mailto:paz.otero@uvigo.es)) and M.A. Prieto ([mprieto@uvigo.es](mailto:mprieto@uvigo.es))

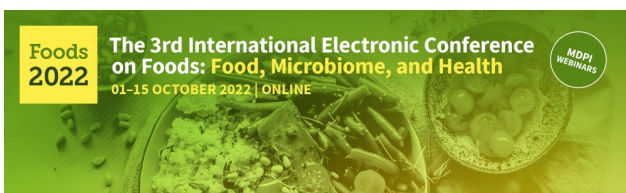

UniversidadeVigo

# Feedstock supply strategy of grape by-products

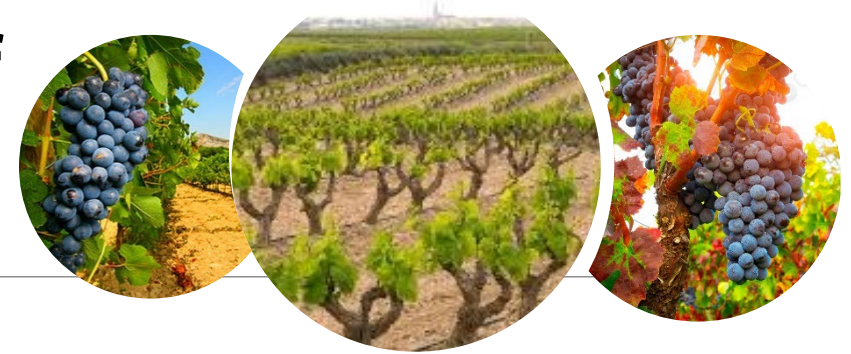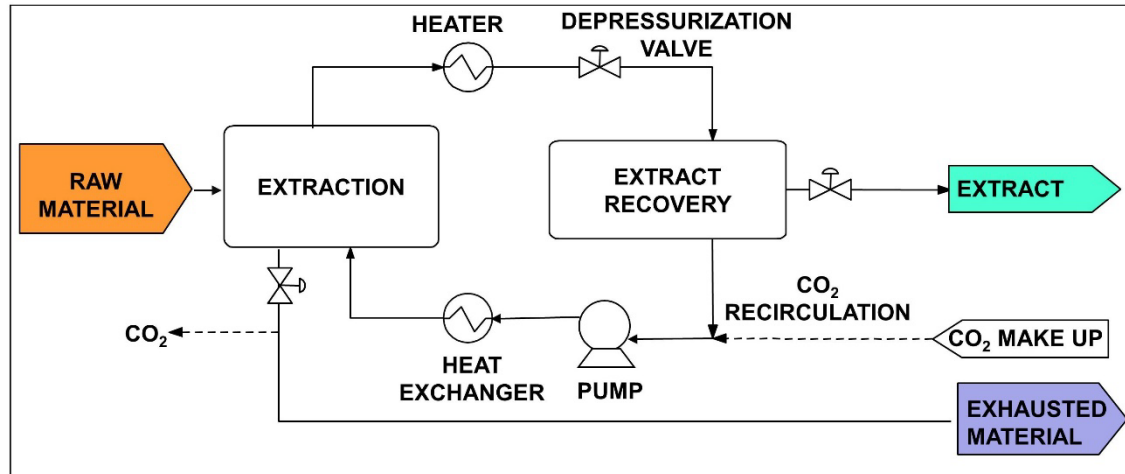

## Supercritical Fluid Extraction CO<sub>2</sub> Optimization Process of fibers from Grape seeds

### 3 Products

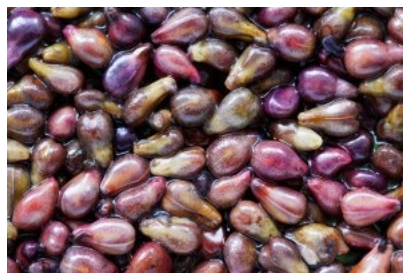

Grape seeds

Grinding and dehydration

Fiber (SPBF+) 1

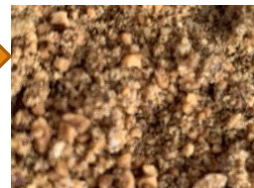

CO<sub>2</sub> Extaction (20 MPa)

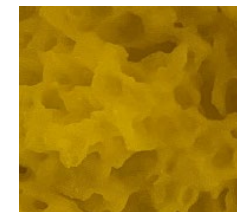

Extract (OSE) 2

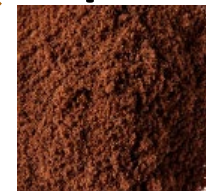

Extracted Fiber (SPBF) 3

# Objective

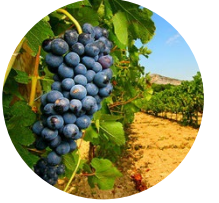

Evaluate 3 products from Grape Seeds

Fiber (SPBF+)

Extracted Fiber (SPBF)

Extract (OSE)

Chemical & nutritional  
characterisation of raw materials

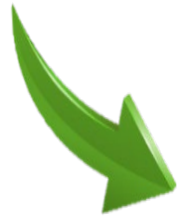

## TECHNO FUNCTIONAL INGREDIENTS

Meat, Juices, Sauces (AMX)  
Healthy Snack Bars (ISA, AIN)  
Yogurt (IK)

## BIO FUNCTIONAL INGREDIENTS

Healthy Snack Bars (ISA, AIN)  
Olive oil (ISA)  
Drinkable gels (AIN)  
Yogurt (IK)

## NUTRACEUTICALS

Smoothfood (BZN)  
Functional beverages (ISA)  
Drinkable gels (AIN)  
Dietary supplements (IK)  
Nutraceutical supplements (ZADE)

## COSMETICS

Cosmetics (ZADE)

**Fortification of  
several food and  
cosmetic matrix**

To comply with the  
requirements of each end  
users.

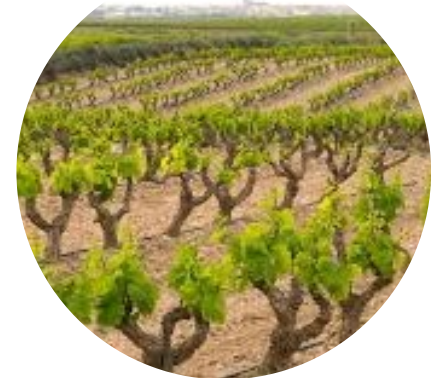

- 1. Analysis of Phenolic profile**
- 2. Analysis of Minerals**
- 3. Analysis of fatty acids (FA)**

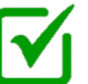

# 1. Analysis of Phenolics by LC-MS/MS

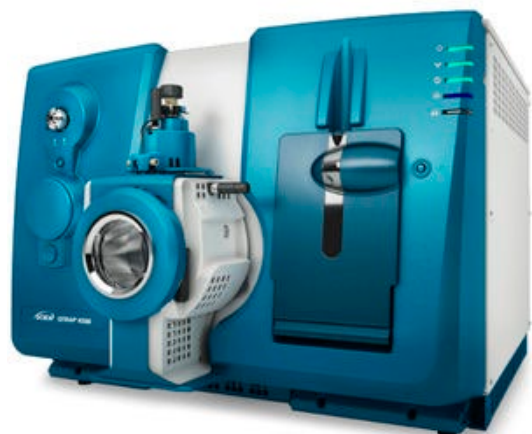

C18 column (PHENOMENEX LUNA, 150 mm × 2 mm and 3 μm).

Column temperature: 40°C

The gradient elution of:

A: 0.1% formic acid in water

B: 0.1% formic acid in acetonitrile

| Phenolic compounds |                       |
|--------------------|-----------------------|
| 4-CBA              | 4-chlorobenzoic acid  |
| VA                 | Vanillic acid         |
| CA                 | Cinnamic acid         |
| DA                 | Dihydroxybenzoic acid |
| FA                 | Ferulic acid          |
| P-CA               | p-coumaric acid       |
| PA                 | Phthalic acid         |
| SA                 | Syringic acid         |
| M-TA               | m-toulic acid         |
| LU                 | Luteolin              |
| SY                 | Syringaldehyde        |
| PTA                | Protocatechuic acid   |
| QE                 | Quercetin             |
| VN                 | Vanillin              |
| SAA                | Salycilic acid        |
| RU                 | Rutin                 |

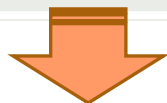

**Comonly found in fruits** 

| Tyrosol and derivatives |                |
|-------------------------|----------------|
| TYR                     | Tyrosol        |
| HTYR                    | Hydroxytyrosol |
| LIG                     | Ligstroside    |
| OLE                     | Oleacein       |
| OLS                     | Oleuroside     |
| OLP                     | Oleuropein     |

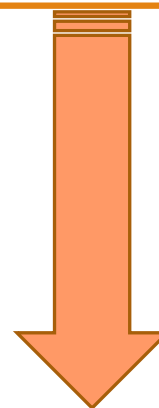

| Flavonoids |             |
|------------|-------------|
| CAT        | Catechin    |
| EDPICAT    | Epicatechin |

| Other phenolics |             |
|-----------------|-------------|
| RESV            | Resveratrol |

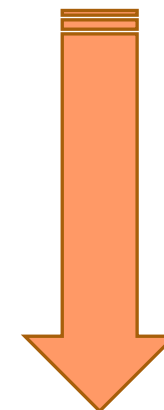

**Grape** 

# 1. Analysis of Phenolics by LC-MS/MS

## Grape by-products

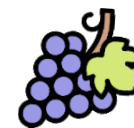

**Table 1. Quantification of phenolic compounds in grape seeds samples**

| Product         | CODE  | EXT.<br>(MPa) | PHENOLIC COMPOUNDS (mg/kg) |       |    |        |       |       |       |       |      |       |       |       |       |       |       |       |
|-----------------|-------|---------------|----------------------------|-------|----|--------|-------|-------|-------|-------|------|-------|-------|-------|-------|-------|-------|-------|
|                 |       |               | 4-CBA                      | VA    | CA | DA     | FA    | P-CA  | PA    | SA    | M-TA | LU    | SY    | PTA   | QE    | VN    | SAA   | RU    |
| Fiber           | GPBF+ | -             | -                          | 1.158 | -  | 42.580 | 0.243 | 0.213 | 0.644 | 2.136 | -    | 0.076 | 0.274 | 88.66 | 4.856 | 0.414 | 0.189 | 2.204 |
| Extracted Fiber | GPBF  | 20            | -                          | 1.054 | -  | 33.880 | 0.255 | 0.233 | 0.585 | 2.144 | -    | 0.068 | 0.242 | -     | 4.912 | 0.305 | 0.210 | 2.132 |
| Extract         | GSE*  | 20            | -                          | 9.638 | -  | 0.884  | 0.278 | 0.164 | 0.196 | 0.208 | -    | 0.004 | 3.320 | -     | 0.024 | 9.326 | 0.047 | -     |

**Table 2. Quantification of tyrosol and their derivatives in grape seeds samples**

| Product         | CODE  | EXT.<br>(MPa) | TYROSOL AND DERIVATIVES (mg/kg) |        |     |         |       |       |
|-----------------|-------|---------------|---------------------------------|--------|-----|---------|-------|-------|
|                 |       |               | TYR                             | HTYR   | LIG | OLE     | OLS   | OLP   |
| Fiber           | GPBF+ | -             | -                               | 0.357  | -   | 0.111   | -     | -     |
| Extracted Fiber | GPBF  | 20            | -                               | 0.323  | -   | 0.543   | 0.001 | 0.005 |
| Extract         | GSE*  | 20            | 8.644                           | 10.226 | -   | 156.942 | 0.001 | 0.004 |

**Table 3. Resveratrol**

| Nº              | PRODUCT | Resveratrol (mg/kg) |
|-----------------|---------|---------------------|
| Fiber           | GPBF+   | 1.00                |
| Extracted Fiber | GPBF    | 1.15                |
| Extract         | GSE     | 0.04                |

**Table 4. Quantification of catechin and epicatechin of selected grape seeds samples.**

| Nº              | PRODUCT | CATECHIN (mg/kg) | EPICATECHIN (mg/kg) |
|-----------------|---------|------------------|---------------------|
| Fiber           | GPBF    | 81.05            | 28.52               |
| Extracted Fiber | GPBF    | 83.35            | 26.65               |
| Extract         | GSE*    | -                | -                   |

**Main compounds:** dihydroxybenzoic acid (DA), quercetin (QE), salicylic acid (SA), rutin (RU), catechin (CAT) and resveratrol in seed fibers (GPBF+ and GPBF).  
Tyrosol (TYR), hydroxytyrosol (HTRY) and oleacein (OLE) in extracts (GSE)

# Conclusions

## 1. Analysis of Phenolics by LC-MS/MS

### Grape by-products

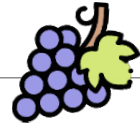

### Targets:

#### 1. Extracted Fiber (GPBF)

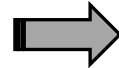

- Dihydroxibenzoic acid (DA, 33.8 mg/kg)
- Quercetin (QE, 2.2 mg/kg)
- Salicylic acid (SA, 4.9 mg/kg)
- Rutin (RU, 2.1 mg/kg)
- Catechin (CAT, 83 mg/kg)
- Resveratrol (RESV, 1.1 mg/kg)

#### 2. Fiber (GPBF+)

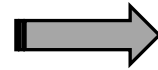

- Dihydroxibenzoic acid (DA, 42.5 mg/kg)
- Quercetin (QE, 4.8 mg/kg)
- Salicylic acid (SA, 2.1 mg/kg)
- Rutin (RU, 2.2 mg/kg)
- Catechin (CAT, 81 mg/kg)
- Resveratrol (RESV, 1 mg/kg)

#### 3. Extract (GSE)

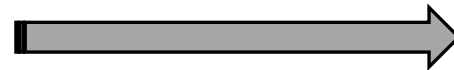

- Tyrosol (TYR, 8.64 mg/kg)
- Hydroxytyrosol (HTRY, 10.2 mg/kg)
- Oleacin (OLE, 157 mg/kg)

## 2. Analysis of minerals by INDUCTIVELY COUPLED PLASMA OPTICAL EMISSION SPECTROMETRY (ICP-OES)

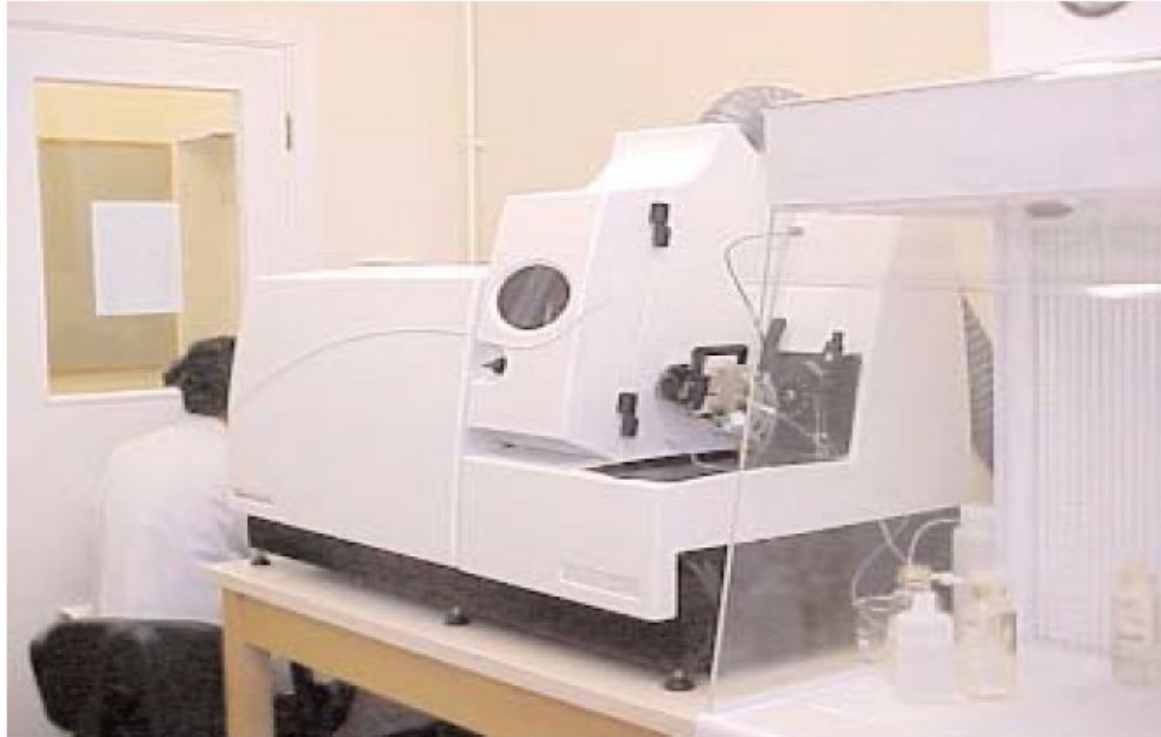

Perkin–Elmer Optima 4300 DV spectrometer (Shelton, CT, USA), equipped with an AS-90 autosampler, axial system, a high dynamic range detector and a cross-flow type nebulizer for pneumatic nebulization.

### Microelements:

[iron (Fe), manganese (Mn), copper (Cu) and zinc (Zn)]

### Macroelements:

[calcium (Ca), potassium (K), magnesium (Mg), phosphorus (P), sodium (Na), sulfur (S), silicon (Si)]

### WAVELENTS OF THE MINERALS

| Ca      | Cu      | Fe      | K       | Mg      | Mn      | Na      | P       | Zn      | S       | Si      | Al      | B       | Cr      | Ni      |
|---------|---------|---------|---------|---------|---------|---------|---------|---------|---------|---------|---------|---------|---------|---------|
| 317.933 | 327.393 | 238.204 | 766.490 | 285.213 | 257.610 | 589.592 | 213.617 | 206.200 | 181.975 | 251.611 | 167.079 | 249.773 | 267.716 | 231.604 |

## 2. Analysis of minerals by ICP-OES

Table 5. Quantification of minerals in grape seeds samples.

| N°              | PRODUCT | EXT | MINERALS (mg/kg) |        |      |       |        |        |      |       |        |      |      |      |      |      |
|-----------------|---------|-----|------------------|--------|------|-------|--------|--------|------|-------|--------|------|------|------|------|------|
|                 |         |     | Ash (%)          | Ca     | Cu   | Fe    | K      | Mg     | Mn   | Na    | P      | Zn   | Al   | B    | Cr   | Ni   |
| Fiber           | GPBF+   | -   | 3,10             | 7805,8 | 38,2 | 113,4 | 3982,8 | 1461,7 | 23,6 | 580,2 | 3351,1 | 10,2 | -    | -    | -    | -    |
| Extracted Fiber | GPBF    | 20  | 2,90             | 6530,5 | 33,0 | 27,7  | 3303,3 | 1188,3 | 14,5 | 505,6 | 2861,0 | 9,8  | -    | -    | -    | -    |
| Extract         | GSE     | 20  | -                | 22,66  | 0,25 | 2,96  | 1,53   | 0,59   | 0,15 | 0,34  | 0,99   | 0,39 | 4,33 | 0,99 | 0,44 | 0,59 |

### Grape by-products

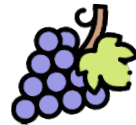

#### Targets:

#### 1. Grape Seeds Fibers (GPBF+)

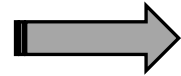

- Ca (7.8 g/kg), K (3.9 g/kg), Mg (1.4 g/kg), P (3.3 g/kg).
- Fe (0.11 g)

#### 2. Grape Seeds Extracted Fibers (GPBF)

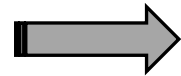

- Ca (6.5 g/kg), K (3.3 g/kg), Mg (1.1 g/kg), P (2.8 g/kg).
- Fe (0.027 g)

#### 3. Grape Seeds Extract (GSEE)

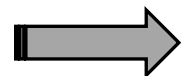

- Low amounts of minerals

**Grape seed fibers are good sources of minerals**



### 3. Analysis of Fatty acids by **GAS CHROMATOGRAPHY FLAME IONIZATION DETECTOR (GC-FID)**

#### GC-FID operating conditions for fatty acids identification

|                              |                                      |
|------------------------------|--------------------------------------|
| Injector T <sup>a</sup> (°C) | 250                                  |
| Injection volume (µL)        | 1                                    |
| Injection                    | Split                                |
| Split ratio                  | 1:50                                 |
| Column                       | Agilent HP-88 30 m x 0,25 mm; 0,2 mm |
| Carrier                      | Helium                               |
| Flow (mL/min)                | 1                                    |

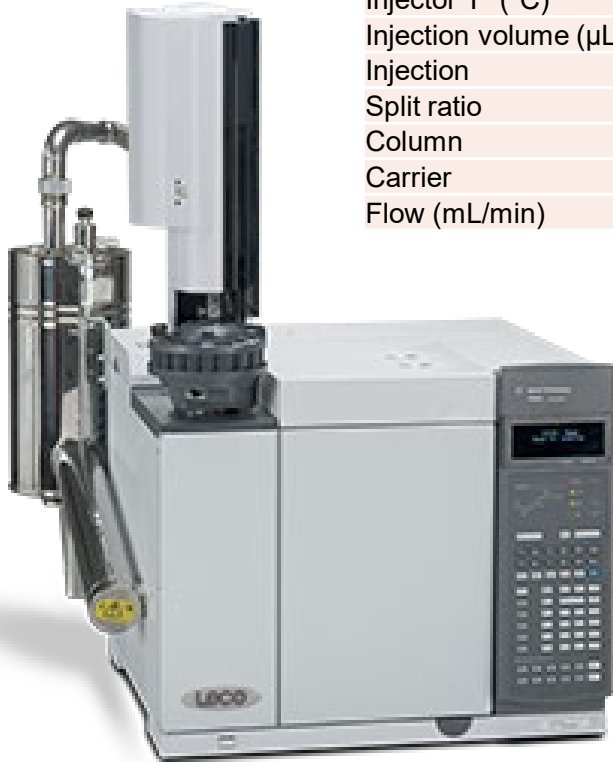

| Temperature ramp (°C/min)    | T (°C) | t hold (min) |
|------------------------------|--------|--------------|
| -                            | 120    | 1            |
| 10                           | 175    | 10           |
| 3                            | 220    | 5            |
| 25                           | 260    | 10           |
| T <sup>a</sup> FID (°C)      | 280    |              |
| Air flow (mL/min)            | 450    |              |
| H <sub>2</sub> Flow (mL/min) | 40     |              |
| Makeup Flow (mL/min)         | 30     |              |
| Analysis time (min)          | 45.1   |              |

#### Short and long chain FA

Rt

| Short and long chain FA                         |                | Rt     |
|-------------------------------------------------|----------------|--------|
| Butyric acid                                    | C4:0           | 1.675  |
| Hexanoic acid                                   | C6:0           | 1.873  |
| Octanoic acid                                   | C8:0           | 2.273  |
| Decanoic acid                                   | C10:0          | 3.004  |
| Undecanoic acid                                 | C11:0          | 3.507  |
| Lauric acid                                     | C12:0          | 4.089  |
| Tridecanoic acid                                | C13:0          | 4.721  |
| Myristic acid                                   | C14:0          | 5.387  |
| Myristoleic acid                                | C14:1          | 5.847  |
| Pentadecanoic acid                              | C15:0          | 6.059  |
| cis-10-Pentadecenoic acid                       | C15:1          | 6.526  |
| Palmitic acid                                   | C16:0          | 6.737  |
| Palmitoleic acid                                | C16:1          | 7.152  |
| Heptadecanoic acid                              | C17:0          | 7.489  |
| cis-10-Heptadecanoic acid                       | C17:1          | 7.983  |
| Stearic acid                                    | C18:0          | 8.383  |
| trans-9-Elaidic acid                            | C18:1 trans    | 8.723  |
| Oleic acid                                      | C18:1 cis      | 8.891  |
| Linolelaidic acid                               | C18:2 trans    | 9.39   |
| Linoleic acid                                   | C18:2 cis      | 9.833  |
| γ-Linolenic acid                                | C18:3 n6       | 10.596 |
| Arachidic acid                                  | C20:0          | 10.842 |
| Linolenic acid                                  | C18:3 n3       | 11.173 |
| cis-11-Eicosenoic acid                          | C20:1          | 11.623 |
| Heneicosanoic acid                              | C21:0          | 12.583 |
| cis-11,14-Eicosadienoic acid                    | C20:2          | 13.147 |
| cis-8,11,14-Eicosatrienoic acid                 | C20:3 n6       | 14.357 |
| Behenic acid                                    | C22:0          | 14.85  |
| cis-11,14,17-Eicosatrienoic acid + Erucate acid | C20:3 n3+C22:1 | 15.333 |
| cis-5,8,11,14-Eicosatetraenoic acid             | C20:4          | 16.118 |
| Tricosanoic acid                                | C23:0          | 17.679 |
| cis-13,16-Docosadienoic acid                    | C22:2          | 17.991 |
| cis-5,8,11,14,17-Eicosapentaenoic acid          | C20:5          | 18.386 |
| Lignoceric acid                                 | C24:0          | 20.342 |
| Nervonic acid                                   | C24:1          | 21.459 |
| cis-4,7,10,13,16,19-Docosahexaenoic acid        | C22:6          | 23.991 |

#### 4. Analysis of Fatty acids by GC-FID

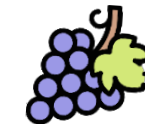

**Table 6. Short chain fatty acids in grape seeds samples.**

|                 | PRODUCT | EXT.  | SHORT CHAIN FATTY ACID (mg/kg) |      |      |       |       |       |       |       |       |       |       |       |       |       |       |
|-----------------|---------|-------|--------------------------------|------|------|-------|-------|-------|-------|-------|-------|-------|-------|-------|-------|-------|-------|
|                 |         | (MPa) | C4:0                           | C6:0 | C8:0 | C10:0 | C11:0 | C12:0 | C13:0 | C14:0 | C14:1 | C15:0 | C15:1 | C16:0 | C16:1 | C17:0 | C17:1 |
| Fiber           | GPBF+   |       | -                              | -    | 186  | -     | -     | 47    | -     | 84    | -     | 13.4  | -     | 10100 | 117   | 101   | -     |
| Extracted Fiber | GPBF    | 20    | -                              | -    | 152  | 45    | -     | 30    | -     | 65    | -     | -     | -     | 10588 | 101   | 93    | -     |
| Extract         | GSE*    | 20    | -                              | -    | 205  | 67    | -     | 209   | -     | 721   | 16    | 156   | -     | 64052 | 4962  | 671   | 875   |

**Main fatty acids: oleic, linoleic and palmitic acids**

**Table 7. Long chain fatty acids in grape seeds samples.**

|                 | PRODUCT | EXT.  | LONG CHAIN FATTY ACID (mg/kg) |             |           |             |           |          |       |          |       |       |       |          |       |                 |       |       |       |       |       |       |       |
|-----------------|---------|-------|-------------------------------|-------------|-----------|-------------|-----------|----------|-------|----------|-------|-------|-------|----------|-------|-----------------|-------|-------|-------|-------|-------|-------|-------|
|                 |         | (MPa) | C18:0                         | C18:1 trans | C18:1 cis | C18:2 trans | C18:2 cis | C18:3 n6 | C20:0 | C18:3 n3 | C20:1 | C21:0 | C20:2 | C20:3 n6 | C22:0 | C20: n3 + C22:1 | C20:4 | C23:0 | C22:2 | C20:5 | C24:0 | C24:1 | C22:6 |
| Fiber           | GPBF+   |       | 5216                          | 57          | 16868     | -           | 82606     | -        | 261   | 612      | 178   | -     | -     | -        | 158   | -               | -     | -     | -     | 31    | 64    | -     | -     |
| Extracted Fiber | GPBF    | 20    | 5045                          | 62          | 17335     | -           | 84724     | -        | 241   | 514      | 170   | -     | -     | 121      | -     | -               | -     | -     | -     | 50    | -     | -     |       |
| Extract         | GSE*    | 20    | 17039                         | -           | 426519    | -           | 161677    | -        | 1567  | 3270     | 1010  | 166   | -     | 1019     | -     | 27              | 174   | -     | -     | 825   | -     | -     |       |

**Table 8. Fatty acid proportion in grape samples.**

| Fatty acid (%) | GPBF+ | GPBF (20MPa) | GSE (20MPa) |
|----------------|-------|--------------|-------------|
| Total SFA      | 13.91 | 13.77        | 12.68       |
| Total USFA     | 86.09 | 86.23        | 87.32       |
| Total MUFA     | 14.76 | 14.81        | 63.25       |
| Total PUFA     | 71.34 | 71.43        | 24.08       |

**Good results for PUFA (Linoleic acid) in Fibers.**

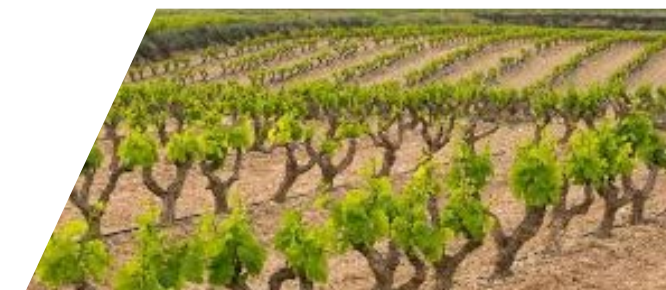

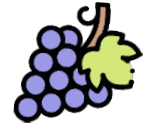

# Conclusion

---

The by-products derived from the *Vitis vinifera* L processing industry contain different bioactive molecules such as polyphenols, flavonoids, minerals and fatty acids which can be recovered and re-used following circular economy policies.

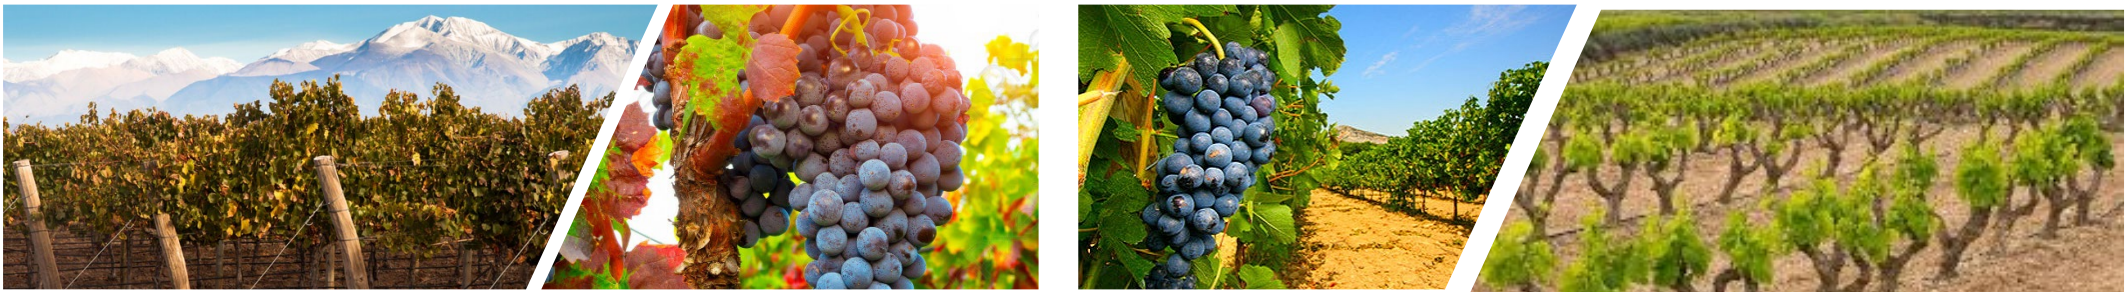

# Future work

**A fortification plan is being created based on the functional ingredient requirements by the end users and matrix.**

| PRODUCTS                  | INCORPORATION STRATEGY                                                                                                                                               | ENCAPSULATION NEED                               |                     |                    | BY-PRODUCT PROPOSAL                          |
|---------------------------|----------------------------------------------------------------------------------------------------------------------------------------------------------------------|--------------------------------------------------|---------------------|--------------------|----------------------------------------------|
|                           |                                                                                                                                                                      | Keep the organoleptic characteristics            | Resistance to Temp. | Improve dispersion |                                              |
| Meat                      | Antioxidants to increase the product shelf life. To replace butter/fat by vegetal extracts rich in antioxidants (and avoid fat oxidation improve color, appearance). |                                                  |                     |                    | <b>EXTRACT (OPE)<br/>FIBRE (PBF+ or PBF)</b> |
| Sauces                    |                                                                                                                                                                      |                                                  |                     |                    |                                              |
| Juice                     |                                                                                                                                                                      |                                                  |                     |                    |                                              |
| Nutraceutical Supplements | Minerals                                                                                                                                                             | x                                                |                     |                    | <b>FIBRE (PBF+ or PBF)</b>                   |
| Cosmetics                 | Anti-aging, Antioxidants                                                                                                                                             | x                                                |                     |                    |                                              |
| Smoothfood (Powder)       | Bioactive (neuroprotection, antiinflammatory)                                                                                                                        |                                                  | 80°C                |                    | <b>FIBRE (PBF)</b>                           |
| Healthy Snack Bars        |                                                                                                                                                                      | Antioxidants to increase the product shelf life. | x                   |                    |                                              |
| Drinkable gels            |                                                                                                                                                                      | x                                                | 90°C                |                    | <b>FIBRE (PBF+ or PBF)</b>                   |
| Yogurth                   | High Mineral Content, fibre and bioactive compounds                                                                                                                  | x                                                |                     | x                  | <b>FIBRE (PBF+ or PBF)</b>                   |
| Dietary supplements       |                                                                                                                                                                      |                                                  | x                   |                    |                                              |

Addressing ingredient encapsulation to meet end users requirements

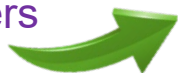

- To keep the organoleptic characteristics of the fortified product intact (avoiding undesirable odours, colour and flavours)
- To keep the phenolic compounds and FA intact after being thermally processed (90°C). Increase self life.
- To be able to work with water soluble or fat soluble matrix and to improve the dispersion

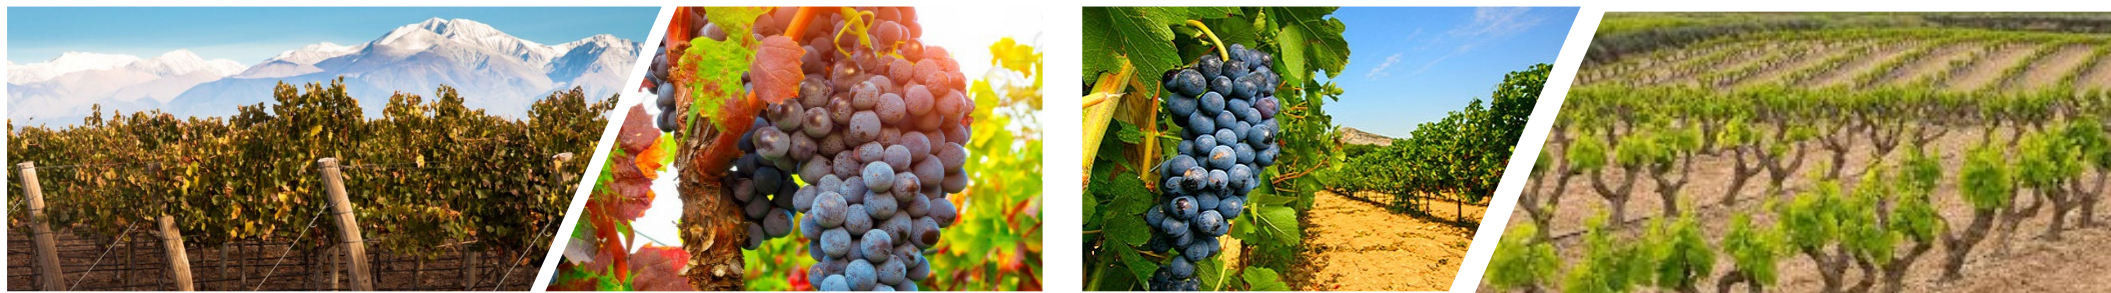

## Chemical and nutritional characterization of by-products from the wine industry. Source of healthy ingredients for the formulation of nutraceuticals and functional foods

**Acknowledgments:** The research leading to these results was supported by MICINN supporting the Ramón y Cajal grant for M.A. Prieto (RYC-2017-22891); by Xunta de Galicia for supporting the program EXCELENCIA-ED431F 2020/12, the post-doctoral grant of L. Cassani (ED481B-2021/152), and the pre-doctoral grant of M. Carpena (ED481A 2021/313). The research leading to these results was supported by the European Union through the “NextGenerationEU” program supporting the “Margarita Salas” grant awarded to P. Garcia-Perez and the EcoChestnut Project (Erasmus+ KA202) that supports the work of J. Echave. The authors thank the program BENEFICIOS DO CONSUMO DAS ESPECIES TINTORERA-(CO-0019-2021) that supports the work of F. Chamorro. Authors are grateful to Ibero-American Program on Science and Technology (CYTED—AQUA-CIBUS, P317RT0003), to the Bio Based Industries Joint Undertaking (JU) under grant agreement No 888003 UP4HEALTH Project (H2020-BBI-JTI-2019) that supports the work of P. Otero. The JU receives support from the European Union’s Horizon 2020 research and innovation program and the Bio Based Industries Consortium. The project SYSTEMIC Knowledge hub on Nutrition and Food Security, has received funding from national research funding parties in Belgium (FWO), France (INRA), Germany (BLE), Italy (MIPAAF), Latvia (IZM), Norway (RCN), Portugal (FCT), and Spain (AEI) in a joint action of JPI HDHL, JPI-OCEANS and FACCE-JPI launched in 2019 under the ERA-NET ERA-HDHL (n° 696295).

Thanks!

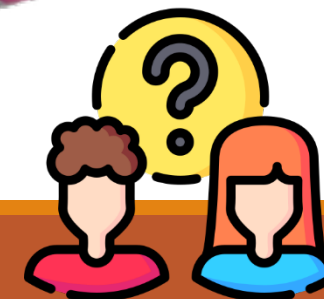

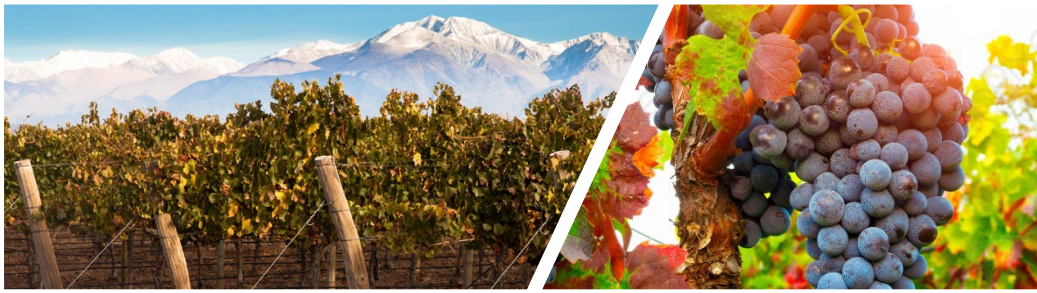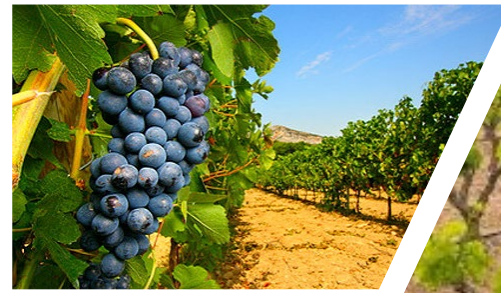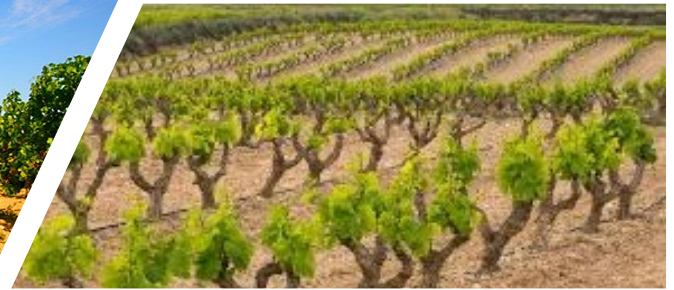

Thanks!

 [Franklin-Noel-Rivo](#)

 [orcid.org/0000-0003-2930-2531](https://orcid.org/0000-0003-2930-2531)

 [@chamorrofrank](#)

 [Miguel-Prieto-Lage](#)

 [orcid.org/0000-0002-3513-0054](https://orcid.org/0000-0002-3513-0054)

 [@michaelumprieto](#)

 [Paz Otero](#)

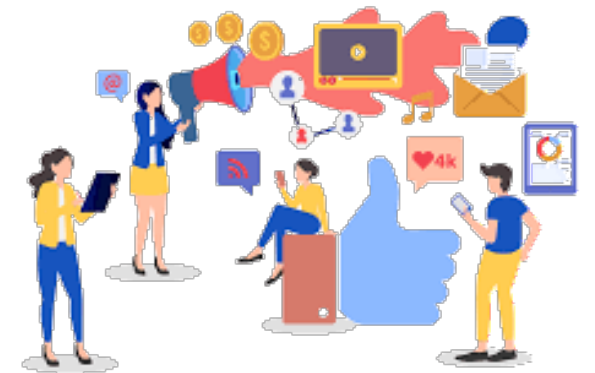

Supplement: s1 [file s1]
